# Supplementary material for: Combining organotypic tissue culture with light‐sheet microscopy (OTCxLSFM) to study glioma invasion
Source: PubMed Central journal article supplement — EMBO Rep. 2023 Nov 8;24(12):e56964. doi: 10.15252/embr.202356964 (PMC10702825; doi:10.15252/embr.202356964), 2023-11-08
Supplement: EMBR-24-e56964-s007.pdf [file EMBR-24-e56964-s007.pdf]

## Expanded View Figures

### Figure EV1. Generating OTCs.

- A Schematic setup of generating 150- $\mu$ m-thick mouse brain slices (OTC) and cutting them along the hemisphere into four intersections and placing them on a Millicell culture insert. Scheme created with [BioRender.com](https://www.biorender.com/).
- B 3D rendering of the CAD design of the thermoforming positive molds for the LSFM holders. An array of eight positive molds is shown. The molds have a square 2  $\times$  2 mm cross-section and a height of 5 mm. On the right panel, the real 3D-printed molds array is displayed.
- C One thermoformed FEP-foil LSFM holder (3  $\times$  25 mm) glued to a sample holder, followed by an OTC is placed inside (right panel).
- D Table depicting the mean and SEM of the tumor cell dispersion of one biological replicate ( $n = 2$  tumors per region) of spheres placed onto different brain regions depicted in (A) using GraphPad Prism 9.

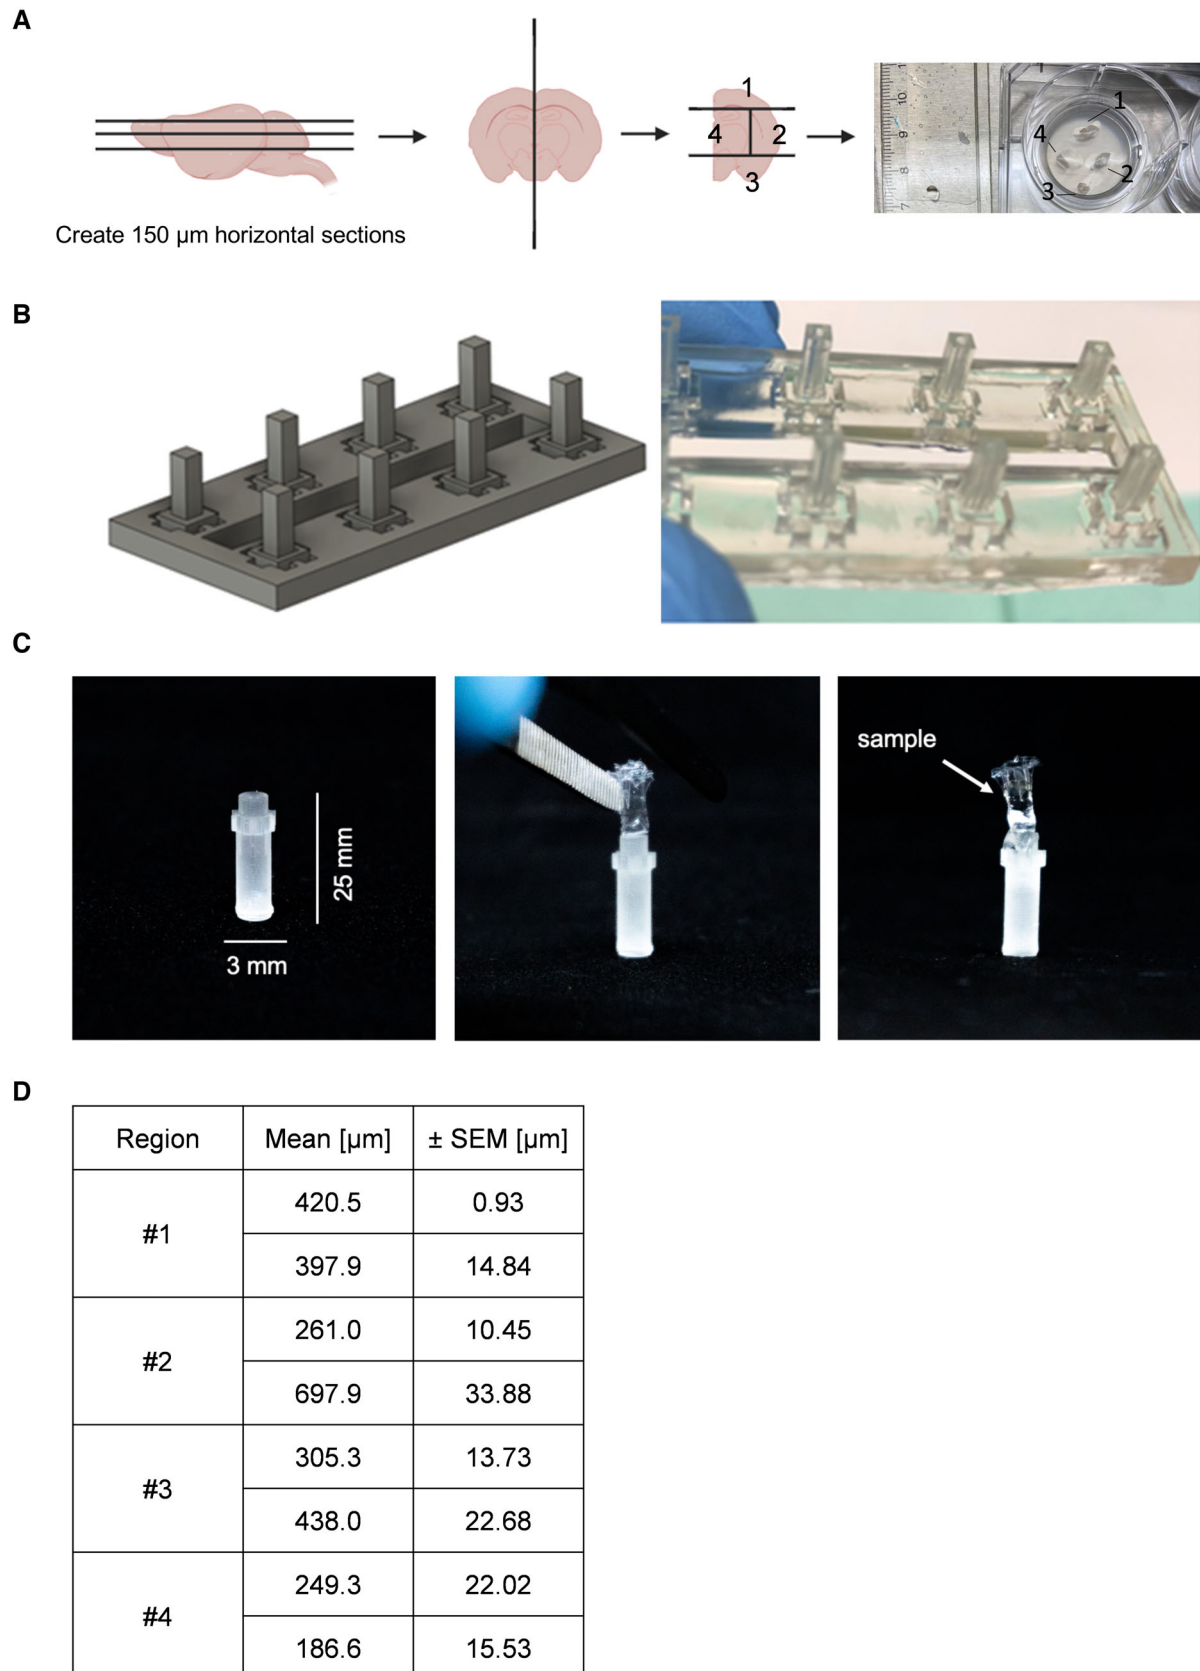

Figure EV1.

**Figure EV2. CD9 depletion leads to reduced migration in GS-5 GSCs.**

- A The expression of CD9 in GS-5 GSCs after lentiviral transduction of a shCD9 plasmid was analyzed via Western blot and quantified in relation to GAPDH expression ( $n = 1$ ).
- B False-color images of the sphere migration assay of GS-5 and GS-5 shCD9 GSCs. Time points are displayed for 0 h (false color, cyan) and 48 h (false color, magenta). Scale bars: 100  $\mu\text{m}$ .
- C Quantification of the sphere migration assay of GS-5 and GS-5 shCD9 GSCs showed difference in migration upon CD9 depletion. The experiment was performed independently at least three times with eight replicates ( $n \geq 24$  biological replicates).

Data information: In (C), data are presented as mean  $\pm$  SEM. ns, not significant; \*\* $P < 0.01$ ; \*\*\*\* $P < 0.0001$  against GS-5 (unpaired  $T$ -test with Mann–Whitney test, GraphPad Prism 9).

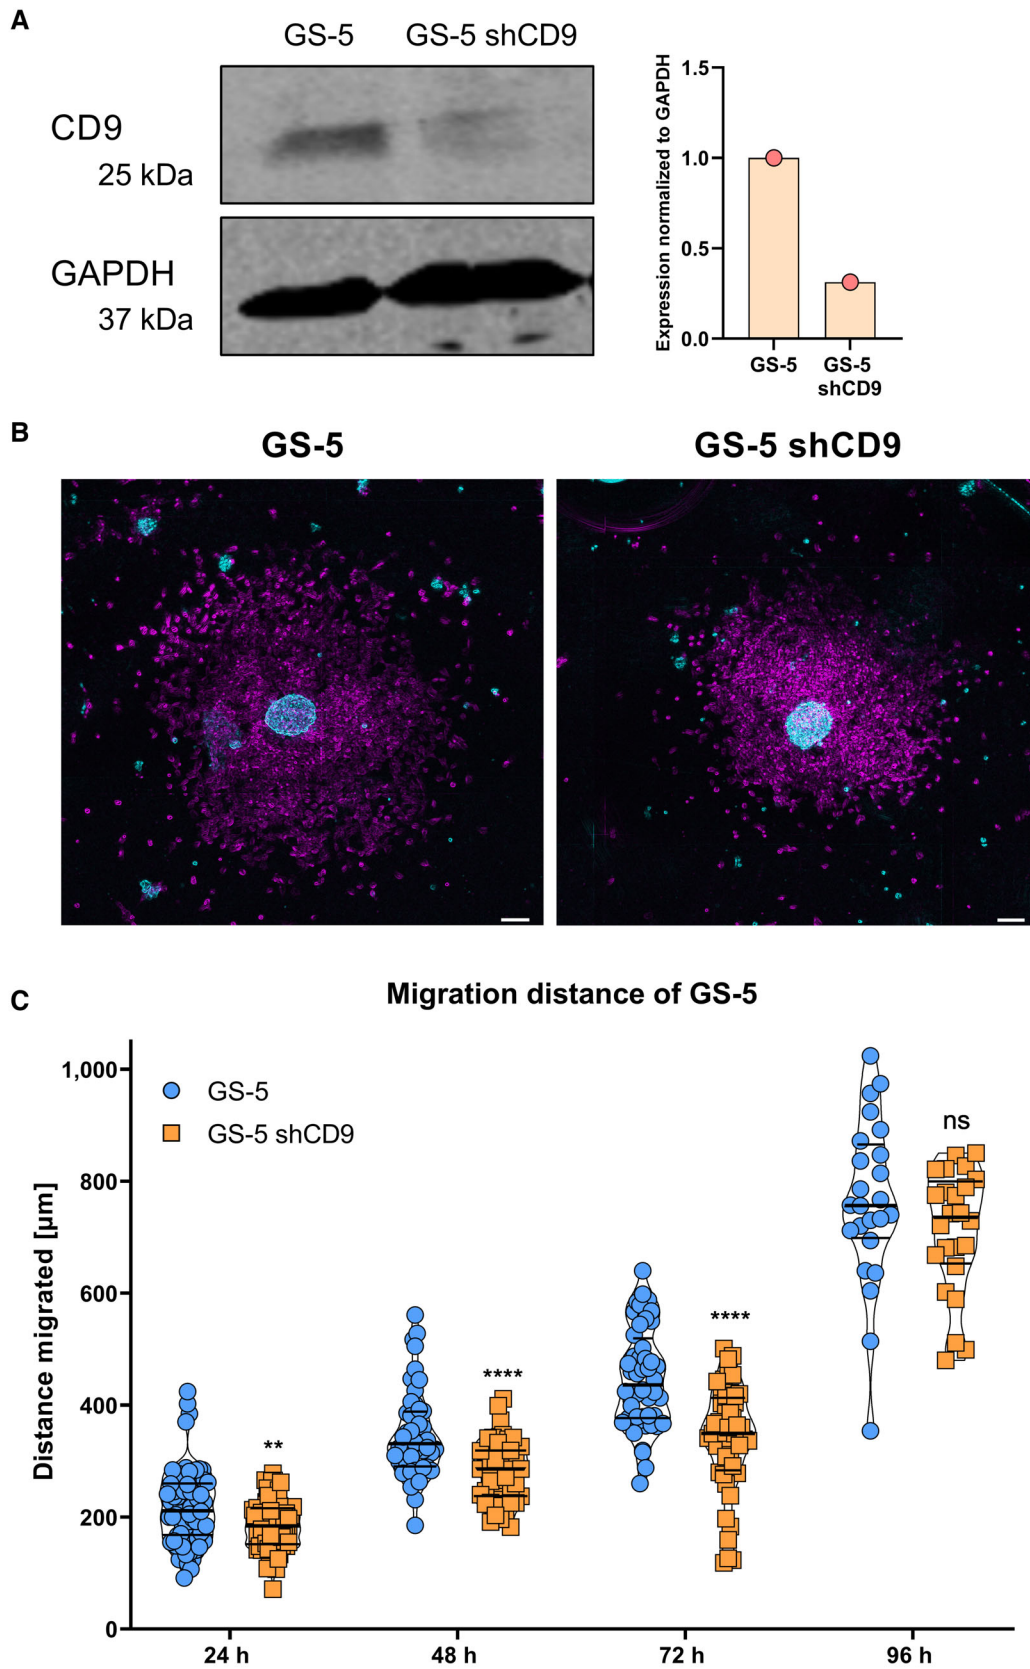

Figure EV2.

**Figure EV3. Genetically STAT3 depletion and pharmacological JAK2/STAT3 inhibition affect tumor growth in *ex vivo* organotypic tissue culture in MZ-54 cells.**

- A Montages of 3D reconstruction of light-sheet images displayed in 90° angles of the same tumor at the latest time point (d5) of MZ-54 wt, MZ-54 STAT3-KO or MZ-54 wt treated with 10 μM WP1066. Arrows display cells which reached their overall maximal migration distance. Scale bars 200 μm.
- B Point plot depicting individual fold-changes tumor sizes at the latest time point (d5) generated from epifluorescence microscopy of MZ-54 wt ( $n = 20$  tumors), MZ-54 STAT3-KO ( $n = 10$  tumors), and MZ-54 wt treated with 10 μM WP1066 ( $n = 16$  tumors), being biological replicates for each condition.
- C Violin plot depicting single tumor cell dispersion at the latest time point (d5) generated from light-sheet images of MZ-54 wt  $n = 3$  tumors ( $n = 103,314$  single cells), MZ-54 STAT3-KO  $n = 4$  tumors ( $n = 2040$  single cells), and MZ-54 treated with 10 μM WP1066  $n = 3$  tumors ( $n = 932$  single cells), each point represents one tumor cell.

Data information: In (B, C), data are presented as mean ± SEM.  $^{**}P < 0.01$ ;  $^{****}P < 0.0001$  against MZ-54 wt (unpaired *T*-test with Mann–Whitney test, GraphPad Prism 9).

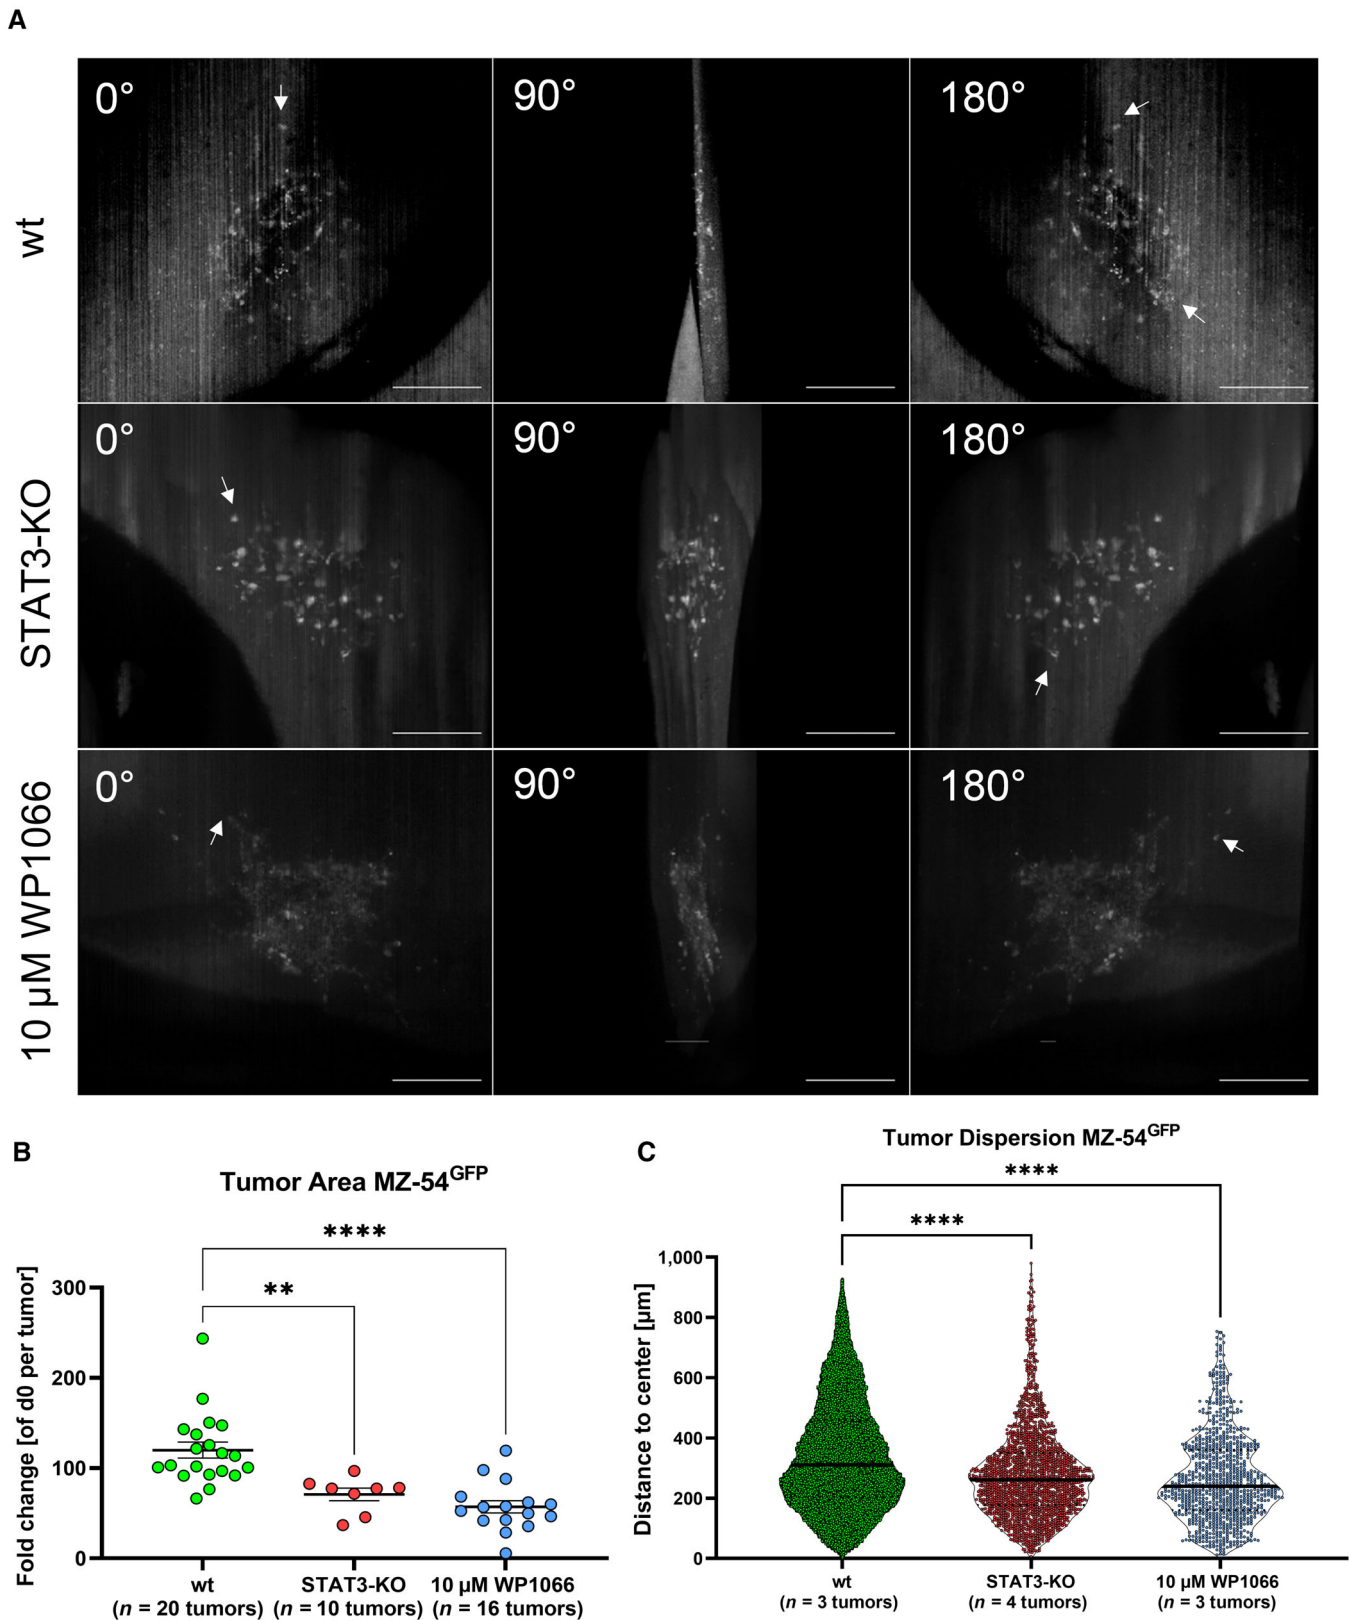

Figure EV3.

A

## NCH644

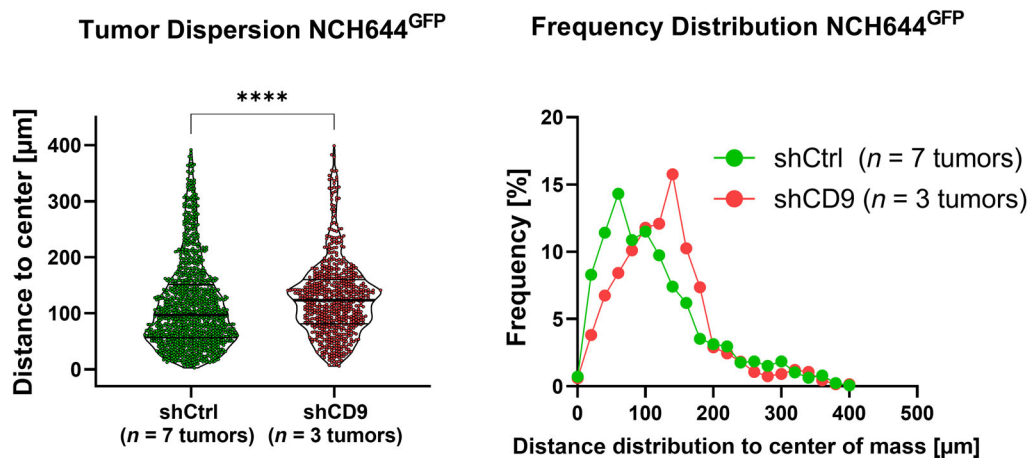

B

## NCH421k

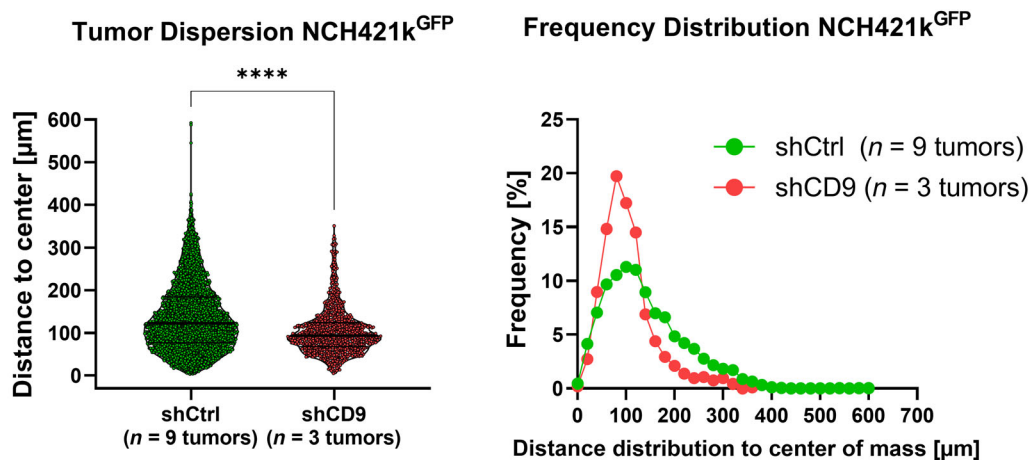

**Figure EV4. Quantification of confocal generated pictures observing CD9 depletion performing *ex vivo* organotypic tissue culture using GSC line NCH644 and NCH421k shCtrl and shCD9.**

A Violin plot depicting single tumor cell dispersion, each point represents one tumor cell, for NCH644 shCtrl ( $n = 7$  tumors and  $n = 1,247$  single cells) and shCD9 ( $n = 3$  tumors and  $n = 671$  single cells). Frequency distribution showing the relative amount of migration distance in 25 µm bins of NCH644 tumors.

B Violin plot depicting single tumor cell dispersion, each point represents one tumor cell for NCH421k shCtrl ( $n = 9$  tumors and  $n = 3,345$  single cells) and shCD9 ( $n = 3$  tumors and  $n = 958$  single cells). Frequency distribution showing the relative amount of migration distance in 25 µm bins of NCH421k tumors.

Data information: In (A, B), data are presented as mean ± SEM. \*\*\*\* $P < 0.0001$  against shCtrl cells (unpaired  $T$ -test with Mann–Whitney test, GraphPad Prism 9).



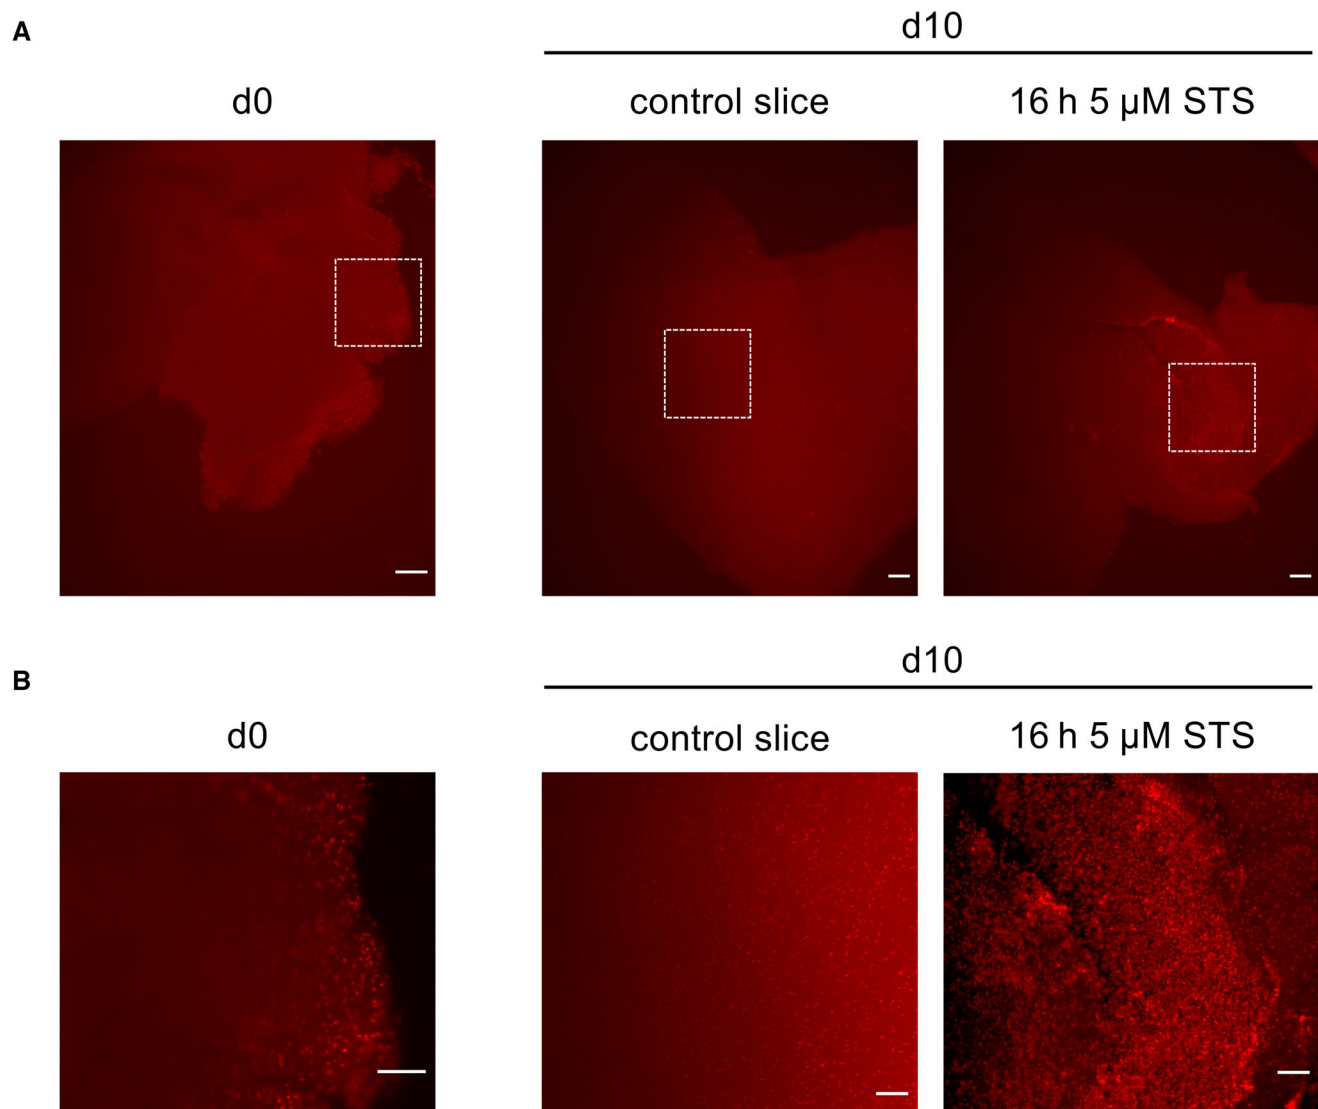

**Figure EV5. Integrity of mouse brain slices.**

A PI staining of mouse brain slice pictured after d0 and maximum incubation time d10. Slices were incubated on day 9 for 16 h with 5  $\mu$ M staurosporine (STS) as indicator for cell death. Scale bars 200  $\mu$ m.

B Close-up of pictures depicted in white boxes in (A) for better visualization. Scale bars 100  $\mu$ m.
